# Supplementary material for: The hormonal peptide Elabela guides angioblasts to the midline during vasculogenesis
Source: eLife. 2015 May 27;4:e06726. doi: 10.7554/eLife.06726 (PMC4468421; doi:10.7554/eLife.06726)
Supplement: Figure 2—source data 1. — DOI: http://dx.doi.org/10.7554/eLife.06726.009 [file elife-06726-fig2-data1.xlsx]

## Sheet: Sheet1
apln/ela double mutants: genotype phenotype comparison														Sum of 2 clutches in Fig. 2c
			apln+/+ ela +/+	apln+/- ela +/+	apln-/- ela +/+	apln+/+ ela +/-	apln+/- ela +/-	apln-/- ela +/-	apln+/+ ela -/-	apln+/- ela -/-	apln-/- ela -/-
Sum of 2 clutches in Fig. 2c	WT like	categorie I	1	9	2	5	6	1	0	0	0
(all embryos in clutch analysed)	aplnra like	categorie II	0	0	1	3	6	2	0	0	0
	aplnrb like	categorie III	0	0	0	0	0	0	4	6	1
	double like	categorie IV	0	0	0	0	0	0	1	2	2
		sum	1	9	3	8	12	3	5	8	3	52
Sum of 3 clutches			apln+/+ ela +/+	apln+/- ela +/+	apln-/- ela +/+	apln+/+ ela +/-	apln+/- ela +/-	apln-/- ela +/-	apln+/+ ela -/-	apln+/- ela -/-	apln-/- ela -/-
(subset of clutch analysed)	WT like	categorie I	3	2	0	1	2	0	0	0	0
	aplnra like	categorie II	0	0	0	1	5	2	0	1	0
	ela like	categorie III	0	0	0	0	0	0	8	3	1
	double like	categorie IV	0	0	0	0	0	0	1	2	5
		sum	3	2	0	2	7	2	9	6	6	37
Sum of all 5 analysed clutches			apln+/+ ela +/+	apln+/- ela +/+	apln-/- ela +/+	apln+/+ ela +/-	apln+/- ela +/-	apln-/- ela +/-	apln+/+ ela -/-	apln+/- ela -/-	apln-/- ela -/-	number of embryos
	WT like	categorie I	4	11	2	6	8	1	0	0	0
	aplnra like	categorie II	0	0	1	4	11	4	0	1	0
	ela like	categorie III	0	0	0	0	0	0	12	9	2			Sum of all analysed embryos (89)
	double like	categorie IV	0	0	0	0	0	0	2	4	7
		sum	4	11	3	10	19	5	14	14	9	89
