# Supplementary material for: The hormonal peptide Elabela guides angioblasts to the midline during vasculogenesis
Source: eLife. 2015 May 27;4:e06726. doi: 10.7554/eLife.06726 (PMC4468421; doi:10.7554/eLife.06726)
Supplement: Figure 5—source data 1. — DOI: http://dx.doi.org/10.7554/eLife.06726.016 [file elife-06726-fig5-data1.xlsx]

## Sheet: new
		aplnra/b MO fli-gfp+ in WT
			in %		in %		in %
		no of GFP positive cells	no of GFP positive cells	no of GFP cells not in midline	no of GFP cells not in midline	no of GFP cells in midline	no of GFP cells in midline
2014.02.18 aplnra/b MO in WT		22	100	20	90.9091	2	9.09091
		11	100	9	81.8182	2	18.1818
		8	100	7	87.5	1	12.5
		7	100	7	100	0	0
		14	100	13	92.8571	1	7.14286
average		12.4	100	11.2	90.6169	1.2	9.38312
STEDV		6.87992	0	6.23832	7.6159	0.957427	7.6159
SEM		3.07679	0	2.78986	3.40593	0.428174	3.40593
ttest		3.44577e-08
sum		62
		Ctr MO in WT
			in %		in %		in %
		no of GFP positive cells	no of GFP positive cells	no of GFP cells not in midline	no of GFP cells not in midline	no of GFP cells in midline	no of GFP cells in midline
Ctr MO in WT		8	100	0	0	8	100
		9	100	0	0	9	100
		6	100	0	0	6	100
		4	100	0	0	4	100
17.3.2014		4	100	1	25	3	75
5.3.2014		6	100	1	20	5	80
		2	100	0	0	2	100
average		5.57143		0.285714	6.42857	5.28571	93.5714
STEDV		2.43975	0	0.48795	11.0733	2.56348	11.0733
SEM		0.922139	0	0.184428	4.18533	0.968904	4.18533
sum		39
		WT in aplnra/b MO
			in %		in %		in %
	embryo no.	no of GFP positive cells	no of GFP positive cells	no of GFP cells not in midline	no of GFP cells not in midline	no of GFP cells in midline	no of GFP cells in midline
11.12.2013	1	2	100	0	0	2	100
17.12.2013	2	1	100	0	0	1	100
18.01.2014	1	3	100	0	0	3	100
06.03.2014	1	3	100	1	33.3333	2	66.6667
21.3.2014	3	4	100	1	25	3	75
2014-03-11	2	2	100	1	50	1	50
average		2.5	100	0.5	18.0556	2	81.9444
STEDV		1.04881	0	0.547723	21.3546	0.894427	21.3546
SEM		0.428174	0	0.223607	8.71797	0.365148	8.71797
test		0.519008
sum		13
