# Supplementary material for: The hormonal peptide Elabela guides angioblasts to the midline during vasculogenesis
Source: eLife journal article supplement (doi:10.7554/elife.06726), 2015-05-27
Supplement: supp [file elife_poa_e06726_Figure_2_figure_supplement_2.pdf › elife_poa_e06726_Figure_2_figure_supplement_2.pdf]

a)

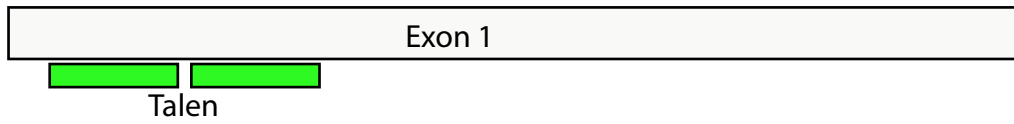

Wild-type ...CCGGAATACACCGAGACATACGATTACTACGATACTGGCTATAATGACTCTGGGTGTGACTAC...

aplnra<sup>mu296</sup>(+8) ...CCGGAATACACCGAGACATACGATTACTAatCGATTACTaatcaGGCTATAATGACTCTGGGTGTGACTAC...

stop

WT 362 AA  
stop at AA 13

b)

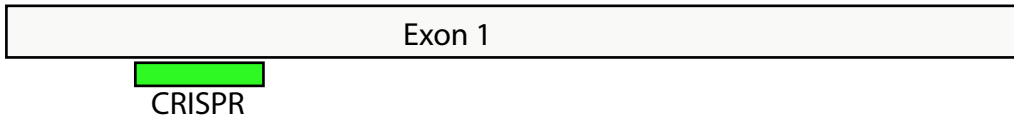

Wild-type ...TCTGATTCCCGTGCTCTACATGCTCATCTTCATCCTGGGACTCACT...

aplnrb<sup>mu270</sup>(+4) ...TCTGATTCCCGTGCTCTACATGCTCATCTTCAGctcTCCTGGGACTCACT... stop

WT 359 AA  
stop at AA 65

c)

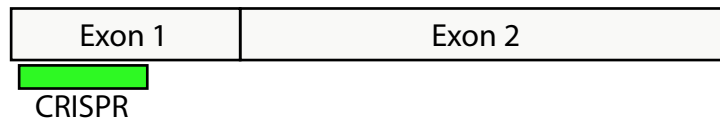

Wild-type ATGAATGTGAAGATCTTGACGCTGGTGATT

apln<sup>mu267</sup> (-1;+9) ATGAATGTGAAGATCTTGttttcatttCGCTGGTGATT

stop

WT 77 AA  
stop at AA 11
