# Supplementary figures and images for: The hormonal peptide Elabela guides angioblasts to the midline during vasculogenesis
Source: eLife journal article supplement (doi:10.7554/elife.06726), 2015-05-27

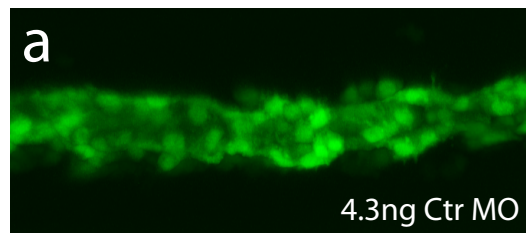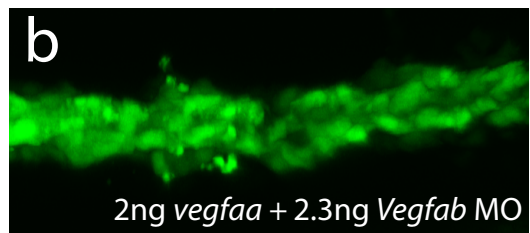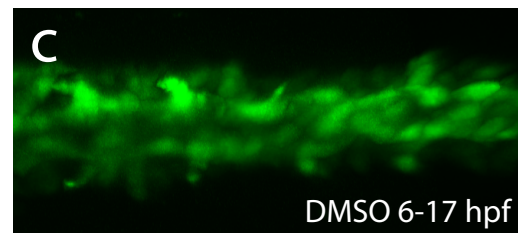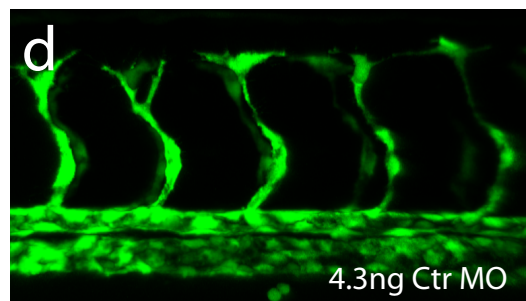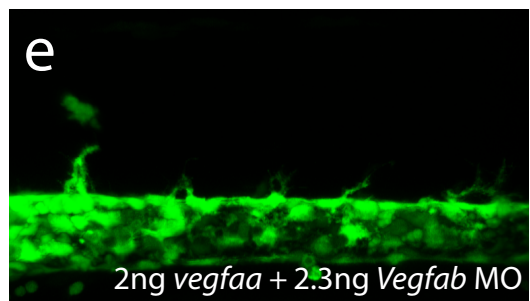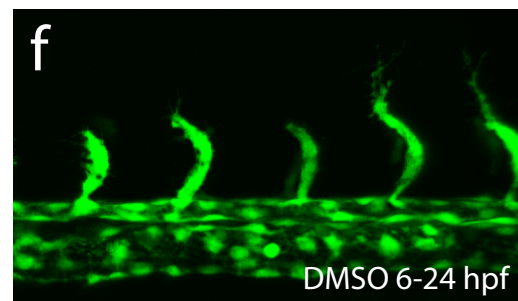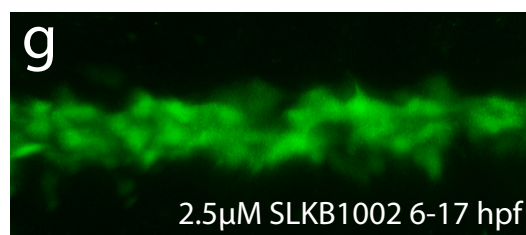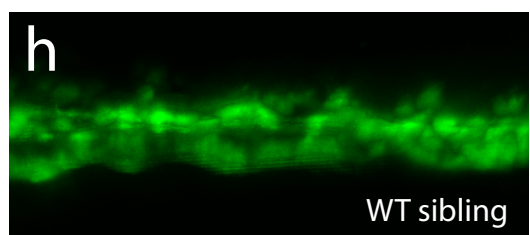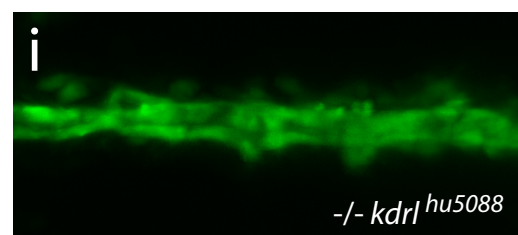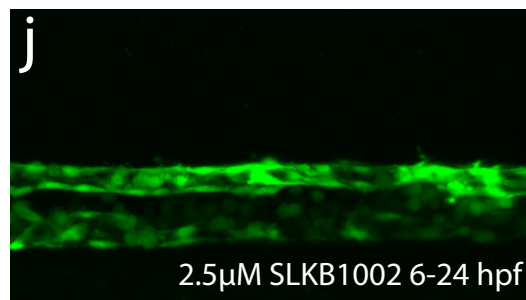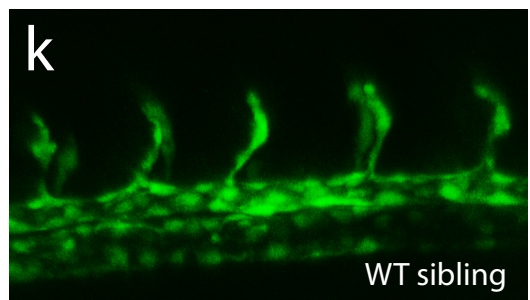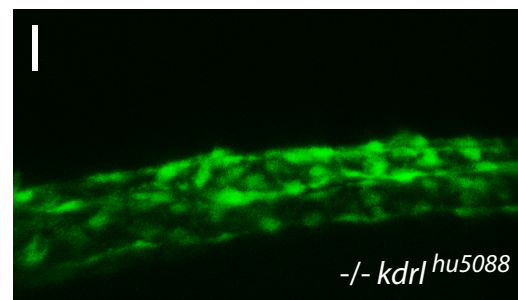

Supplement: supp [file elife_poa_e06726_Figure_1_figure_supplement_1.pdf › elife_poa_e06726_Figure_1_figure_supplement_1.pdf]

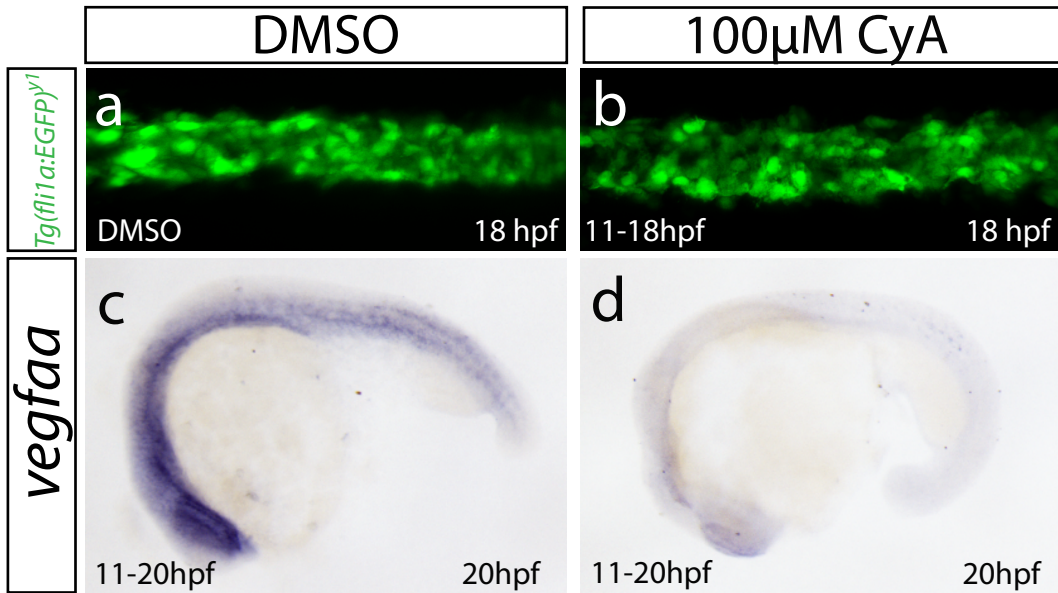

Supplement: supp [file elife_poa_e06726_Figure_1_figure_supplement_2.pdf › elife_poa_e06726_Figure_1_figure_supplement_2.pdf]

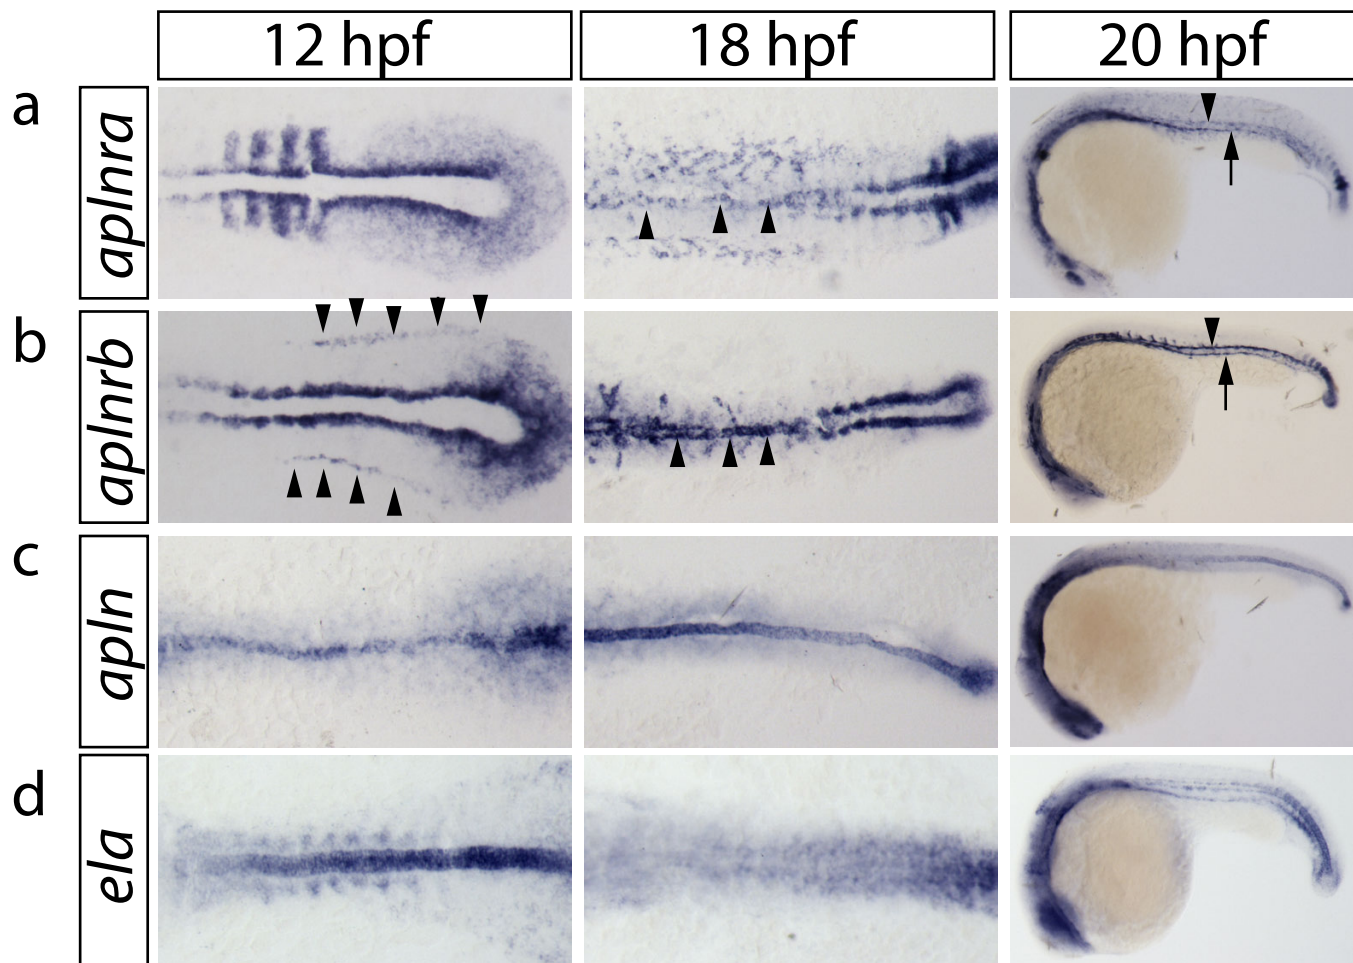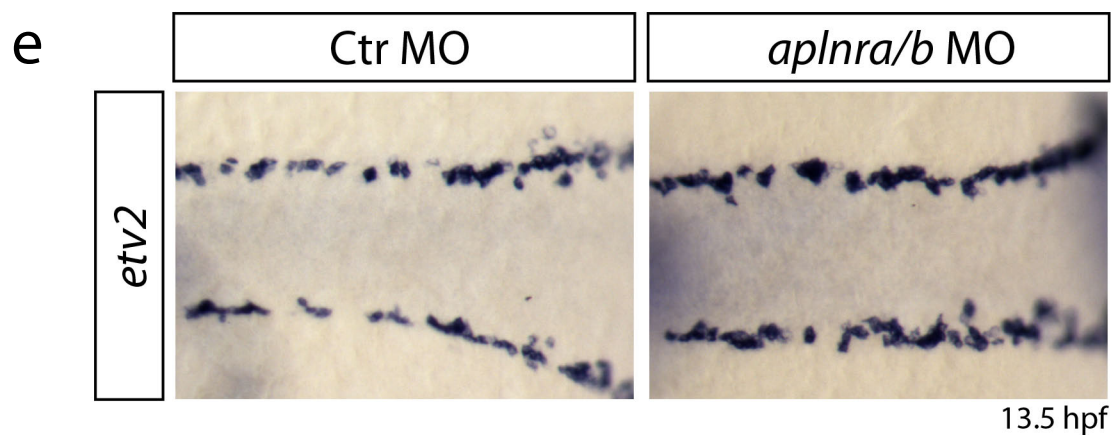

Supplement: supp [file elife_poa_e06726_Figure_2_figure_supplement_1.pdf › elife_poa_e06726_Figure_2_figure_supplement_1.pdf]
